# Supplementary material for: Immunoglobulin light chain allelic inclusion in systemic lupus erythematosus
Source: PubMed Central journal article supplement (PMC5102633; doi:10.1002/eji.201545599), 2015-06-24
Supplement: EJI-45-2409-s001.pdf [file EJI-45-2409-s001.pdf]

**Table S1. Demographic and clinical details of the SLE patients enrolled in this study**  
SLE

| Study # | M/F | Age | Ethnicity | Disease duration (years) | + Auto-Ab status              | Nephritis | Arthritis | Medication          | % of K+λ+ B cells |
|---------|-----|-----|-----------|--------------------------|-------------------------------|-----------|-----------|---------------------|-------------------|
| 9       | F   | 48  | AfC       | 7                        | dsDNA, ANA, ENA, Sm, RNP      | +         | +         | Pred., MTX, HCQ     | 0.26              |
| 11      | F   | 42  | Cauc      | 22                       | ANA, Ro, La, aPL              | -         | +         | Pred., MTX, HCQ     | 0.13              |
| 14      | F   | 57  | Cauc      | 10                       | dsDNA, ANA, ENA, Ro           | +         | +         | Pred., MMF          | 0.64              |
| 15      | F   | 23  | Cauc      | 8                        | dsDNA, ANA, ENA, Ro, RNP, aPL | -         | +         | HCQ                 | 20.02             |
| 16      | F   | 49  | AfC       | 17                       | ANA, ENA, Ro, RNP             | -         | +         | HCQ                 | 18.23             |
| 17      | F   | 45  | Cauc      | 16                       | ANA, ENA, Ro, Sm, aPL         | +         | +         | MMF, HCQ, Mepacrine | 26.06             |
| 18      | F   | 65  | Cauc      | 8                        | ANA, ENA, Ro, Sm, RNP         | -         | +         | no medication       | 1.45              |
| 22      | F   | 73  | Cauc      | 25                       | dsDNA, ANA, ENA, Ro           | -         | +         | HCQ                 | 27.67             |
| 23      | F   | 45  | Cauc      | 15                       | dsDNA, ANA, ENA, Ro, La, aPL  | -         | +         | HCQ                 | 2.71              |
| 24      | F   | 45  | Af        | 6                        | dsDNA, ANA, Ro, La            | +         | +         | HCQ, Pred           | 37.32             |
| 25      | F   | 40  | Cauc      | 14                       | dsDNA, ANA, ENA, Ro, aPL      | -         | -         | HCQ, Pred           | 87.06             |
| 26      | F   | 53  | Cauc      | 18                       | dsDNA, ANA, ENA, Ro, La       | -         | -         | no medication       | 1.18              |
| 31      | F   | 21  | AfC       | 3                        | dsDNA, ANA, ENA, Ro           | +         | +         | AZA, HCQ            | 58.15             |
| 39      | F   | 40  | Asian     | 16                       | dsDNA, ANA                    | +         | +         | AZA, HCQ, Pred      | 50.8              |
| 40      | F   | 35  | Orien     | 13                       | ANA, Ro, La                   | +         | -         | AZA, Pred           | 25.97             |
| 41      | F   | 51  | Cauc      | 9                        | dsDNA, ANA, Ro, Sm, RNP       | -         | -         | MMF, HCQ, Pred      | 2.31              |
| 42      | F   | 63  | Cauc      | 20                       | ANA                           | -         | +         | AZA, Pred           | 0.82              |
| 43      | F   | 46  | Af        | 5                        | dsDNA, ANA, Ro, Sm, RNP       | +         | +         | MMF, HCQ, Pred      | 90.73             |
| 44      | F   | 54  | Af        | 4                        | ANA, RNP                      | -         | +         | HCQ, Pred           | 4.53              |
| 45      | F   | 40  | Af        | 12                       | ANA, aPL                      | +         | -         | MMF, HCQ, Pred      | 14.85             |
| 46      | F   | 23  | Cauc      | 2                        | dsDNA, ANA, Ro, La            | +         | -         | MMF, HCQ, Pred      | 1.18              |
| 47      | F   | 59  | Cauc      | 4                        | ANA                           | -         | +         | Leflunomide, HCQ    | 1.48              |
| 48      | F   | 32  | Cauc      | 3                        | ANA                           | -         | +         | HCQ, Pred           | 2.68              |
| 49      | F   | 51  | Cauc      | 4                        | ANA, Ro                       | -         | -         | none                | 0.31              |
| 56      | F   | 58  | Cauc      | 39                       | ANA, aPL                      | -         | +         | none                | 29.6              |

|     |   |    |          |         |                                      |   |   |                                                           |       |
|-----|---|----|----------|---------|--------------------------------------|---|---|-----------------------------------------------------------|-------|
| 61  | F | 31 | Af       | 5       | dsDNA, ANA                           | - | + | Pred., HCQ, RTX<br>2008, 2009, 2011<br>2012, Thal         | 2.7   |
| 66  | F | 44 | Cauc     | 18      | dsDNA, ANA, ENA,<br>RNP              | + | + | MMF, HCQ, Pred                                            | 3.71  |
| 67  | F | 52 | AfC      | 16      | dsDNA, ANA, ENA,<br>C1q              | + | + | RTX 2012 HCQ, Pred                                        | 27.3  |
| 69  | F | 47 | Af       | 20      | dsDNA, ANA, ENA,<br>Ro, Sm, RNP, C1q | + | + | CYC IV HCQ Pred                                           | 27.5  |
| 70  | M | 62 | Cauc     | 20      | ANA, ENA, Ro, La                     | - | + | HCQ, Pred                                                 | 25    |
| 71  | F | 67 | AfC      | 1       | ANA, ENA, Sm,<br>RNP                 | - | + | RTX 2012 HCQ, Pred                                        | 1.8   |
| 73  | F | 33 | Af       | 9       | ANA, ENA, Ro, Sm                     | - | + | HCQ, Pred                                                 | 7.84  |
| 75  | F | 56 | Cauc     | 12      | sero-negative                        | - | + | RTX 2009 2012 AZA<br>HCQ Pred                             | 7.6   |
| 76  | F | 34 | Af       | 5       | dsDNA, ANA, ENA,<br>Sm, RNP, C1q     | - | + | RTX 2010 2012                                             | 6.8   |
| 77  | F | 51 | Cauc     | 21      | dsDNA, ANA, aPL                      | - | + | HCQ, Pred                                                 | 26    |
| 78  | F | 23 | Oriental | 1       | dsDNA, ANA, ENA,<br>Ro               | - | + | HCQ, Pred                                                 | 2.2   |
| 79  | F | 54 | Asian    | 40      | ANA, aPL                             | + | - | HCQ, Pred                                                 | 17.3  |
| 80  | F | 57 | Cauc     | 14      | dsDNA, ANA                           | + | + | HCQ, Pred                                                 | 7.3   |
| 81  | F | 36 | Cauc     | 14      | ANA, ENA, Ro, Sm,<br>RNP             | - | + | RTX 2012 MMF HCQ<br>Pred                                  | 2     |
| 86  | F | 60 | Cauc     | 12      | ANA, ENA, Ro, La                     | - | + | RTX 2012 MTX HCQ<br>Pred                                  | 1.5   |
| 92  | F | 17 | Af       | 10      | dsDNA, ANA, ENA,<br>Ro, Sm, RNP      | + | + | RTX 2010 2012 Pred                                        | 6     |
| 95  | F | 32 | Af       | 5       | dsDNA, ANA, ENA,<br>Ro, Sm, RNP, aPL | + | + | RTX 2012 MMF HCQ<br>Pred                                  | 2.4   |
| 104 | F | 40 | Cauc     | 20      | dsDNA, ANA                           | + | + | RTX 2009 2012 AZA<br>HCQ Pred                             | 9.62  |
| 108 | F | 26 | Af       | 7       | dsDNA, ANA, ENA                      | + | + | RTX 2012 MMF HCQ<br>Pred                                  | 26.3  |
| 8   | F | 55 | Cauc     | Unknown | sero-negative                        | - | + | Statins                                                   | 0.26  |
| 118 | F | 62 | Oriental | 13      | ANA, Ro                              | + | + | MMF, lisinopril, SIM,<br>Pred, AZA, LOS, RAN,<br>Plaqenil | 22.15 |
| 119 | F | 47 | AfC      | 13      | dsDNA, ANA, Sm,<br>RNP               | + | + | AZA, Pred, warfarin,<br>adalat, HCQ,                      | 22.07 |
| 120 | F | 38 | Cauc     | 16      | sero-negative                        | + | + | CAN, HCQ, MTX,<br>NTP, TRA, OMP,                          | 22.17 |
| 121 | F | 41 | Cauc     | 7       | dsDNA, ANA, Ro,<br>Sm, RNP           | + | - | unknown                                                   | 10.68 |
| 122 | F | 37 | Asian    | 12      | ANA, Ro                              | + | + |                                                           | 21.84 |

|     |   |    |          |    |                            |   |   |                                                      |       |
|-----|---|----|----------|----|----------------------------|---|---|------------------------------------------------------|-------|
| 124 | F | 25 | Asian    | 13 | sero-negative              | + | + | Pred,<br>myfortic,warfarin,<br>VAL, ranitidine, HCQ, | 40.7  |
| 125 | F | 24 | Oriental | 5  | dsDNA, ANA, Ro,<br>Sm, RNP | + | + | Pred., MTX, HCQ,<br>MHC                              | 22.49 |
| 126 | F | 46 | AfC      | 21 | ANA, RNP                   | + | + | Pred., aza, HCQ                                      | 0.78  |
| 127 | F | 41 | AfC      | 18 | dsDNA, ANA, La             | - | + | Pred., MMF                                           | 1.22  |
| 128 | F | 56 | AfC      | 3  | dsDNA, Ro, Sm,<br>RNP      | + | - | Pred, HCQ, ramipril,<br>MMF, alendronic cid          | 1.71  |
| 129 | F | 39 | Asian    | 30 | dsDNA, ANA                 | + | - | Pred, AZA, HCQ                                       | 3.12  |

**Table S2. Demographic and clinical details of the GPA patients enrolled in this study**

**GPA**

| Study # | M/F | Age | Ethnicity | BVAS on sample date | + Auto-Ab status | Nephritis | Arthritis | Medication  |
|---------|-----|-----|-----------|---------------------|------------------|-----------|-----------|-------------|
| 1       | M   | 50  | Cauc      | 19                  | cANCA            | -         | -         | Pred        |
| 2       | F   | 38  | Cauc      | 21                  | cANCA            | -         | -         | Pred MTX    |
| 3       | M   | 49  | Cauc      | 18                  | cANCA            | +         | -         | Pred AZA    |
| 4       | M   | 39  | Cauc      | 26                  | cANCA            | -         | -         | Pred MMF    |
| 5       | M   | 56  | Cauc      | 7                   | cANCA            | -         | -         | Pred        |
| 6       | F   | 67  | Asian     | 18                  | cANCA            | -         | -         | Pred        |
| 7       | F   | 57  | Cauc      | 15                  | cANCA            | -         | -         | Pred MTX    |
| 9       | M   | 27  | Cauc      | 12                  | cANCA            | -         | -         | Pred AZA    |
| 10      | M   | 55  | Cauc      | 18                  | cANCA            | -         | -         | Pred AZA    |
| 11      | F   | 45  | Cauc      | 21                  | cANCA            | -         | -         | Pred MMF    |
| 12      | M   | 64  | Cauc      | 30                  | cANCA            | -         | -         | Pred MTX    |
| 13      | M   | 41  | Cauc      | 15                  | cANCA            | -         | -         | Pred MT     |
| 14      | M   | 27  | Cauc      | 18                  | cANCA            | +         | -         | Pred CYC IV |
| 15      | F   | 65  | Cauc      | 4                   | cANCA            | +         | -         | Pred MTX    |
| 16      | F   | 65  | Cauc      | 0                   | cANCA            | +         | -         | Pred MMF    |
| 17      | F   | 62  | Cauc      | 6                   | cANCA            | -         | -         | Pred AZA    |
| 18      | M   | 65  | Cauc      | 12                  | cANCA            | -         | -         | Pred MTX    |
| 19      | M   | 68  | Cauc      | 0                   | cANCA            | -         | -         | Pred MTX    |
| 21      | M   | 65  | Cauc      | 0                   | cANCA            | -         | -         | Pred MTX    |
| 22      | F   | 71  | Cauc      | 6                   | cANCA            | -         | -         | Pred MTX    |
| 23      | F   | 58  | Cauc      | 0                   | cANCA            | -         | -         | Pred MTX    |
| 24      | M   | 41  | Cauc      | 5                   | cANCA            | +         | -         | Pred MTX    |
| 25      | M   | 64  | Cauc      | 30                  | cANCA            | -         | -         | Pred MTX    |

Table S3

## Primer sequences

|                              | <b>Primer name</b> | <b>Primer sequence 5' to 3'</b> |
|------------------------------|--------------------|---------------------------------|
| First round single cell PCR  | VK1                | CATCCAGWTGACCCAGTCTCC           |
|                              | VK2                | GATATTGTGATGACCCAGWCT           |
|                              | VK3                | GACRCAGTCTCCAGCCACCCTG          |
|                              | VK4                | GACATCGTGATGACCCAGTCT           |
|                              | VK5                | GAAACGACACTCACGCAGTCT           |
|                              | VK6                | GAAATTGTGCTGACTCAGTCT           |
|                              | CK1N               | TTAACTACTCTCCCCTGTTGAAGC        |
|                              | LVL1               | GGTCCTGGGCCCAGTCTGTGCTG         |
|                              | LVL2               | GGTCCTGGGCCCAGTCTGCCCTG         |
|                              | LVL3               | GCTCTGTGACCTCCTATGAGCTG         |
|                              | LVL4/5             | GGTCTCTCTCSCAGCYTGTGCTG         |
|                              | LVL6               | GTTCTTGGGCCAATTTTATGGTG         |
|                              | LVL7               | GTTCTTGGGCCAATTTTATGCTG         |
|                              | LVL8               | GAGTGGATTCTCAGACTGTGGTG         |
|                              | IGLC external      | CCTTCCAGGCCACTGTCAC             |
| Second round single cell PCR | VK1                | CATCCAGWTGACCCAGTCTCC           |
|                              | VK2                | GATATTGTGATGACCCAGWCT           |
|                              | VK3                | GACRCAGTCTCCAGCCACCCTG          |
|                              | VK4                | GACATCGTGATGACCCAGTCT           |
|                              | VK5                | GAAACGACACTCACGCAGTCT           |
|                              | VK6                | GAAATTGTGCTGACTCAGTCT           |
|                              | IGKC2              | CTGTACTTTGGCCTCTCTGGG           |
|                              | LVL1               | GGTCCTGGGCCCAGTCTGTGCTG         |
|                              | LVL2               | GGTCCTGGGCCCAGTCTGCCCTG         |
|                              | LVL3               | GCTCTGTGACCTCCTATGAGCTG         |
|                              | LVL4/5             | GGTCTCTCTCSCAGCYTGTGCTG         |
|                              | LVL6               | GTTCTTGGGCCAATTTTATGGTG         |
|                              | LVL7               | GTTCTTGGGCCAATTTTATGCTG         |
|                              | LVL8               | GAGTGGATTCTCAGACTGTGGTG         |
|                              | IGLC2              | GCCACTGTCACRGCTCCCGGGC          |
| First round intron / KDE     | 5' JkCk intron E   | CCGCGCTCTTGGGGCAGCCGCC          |
|                              | 3' KDE E           | CAGACAGGTCCTCAGAGGTC            |
| Second round intron / KDE    | JkCk intron I      | GCCGCTATGCCGTGGCCACCC           |
|                              | KDE I              | CAGGTTGTCCTAGGGAGCAGGG          |

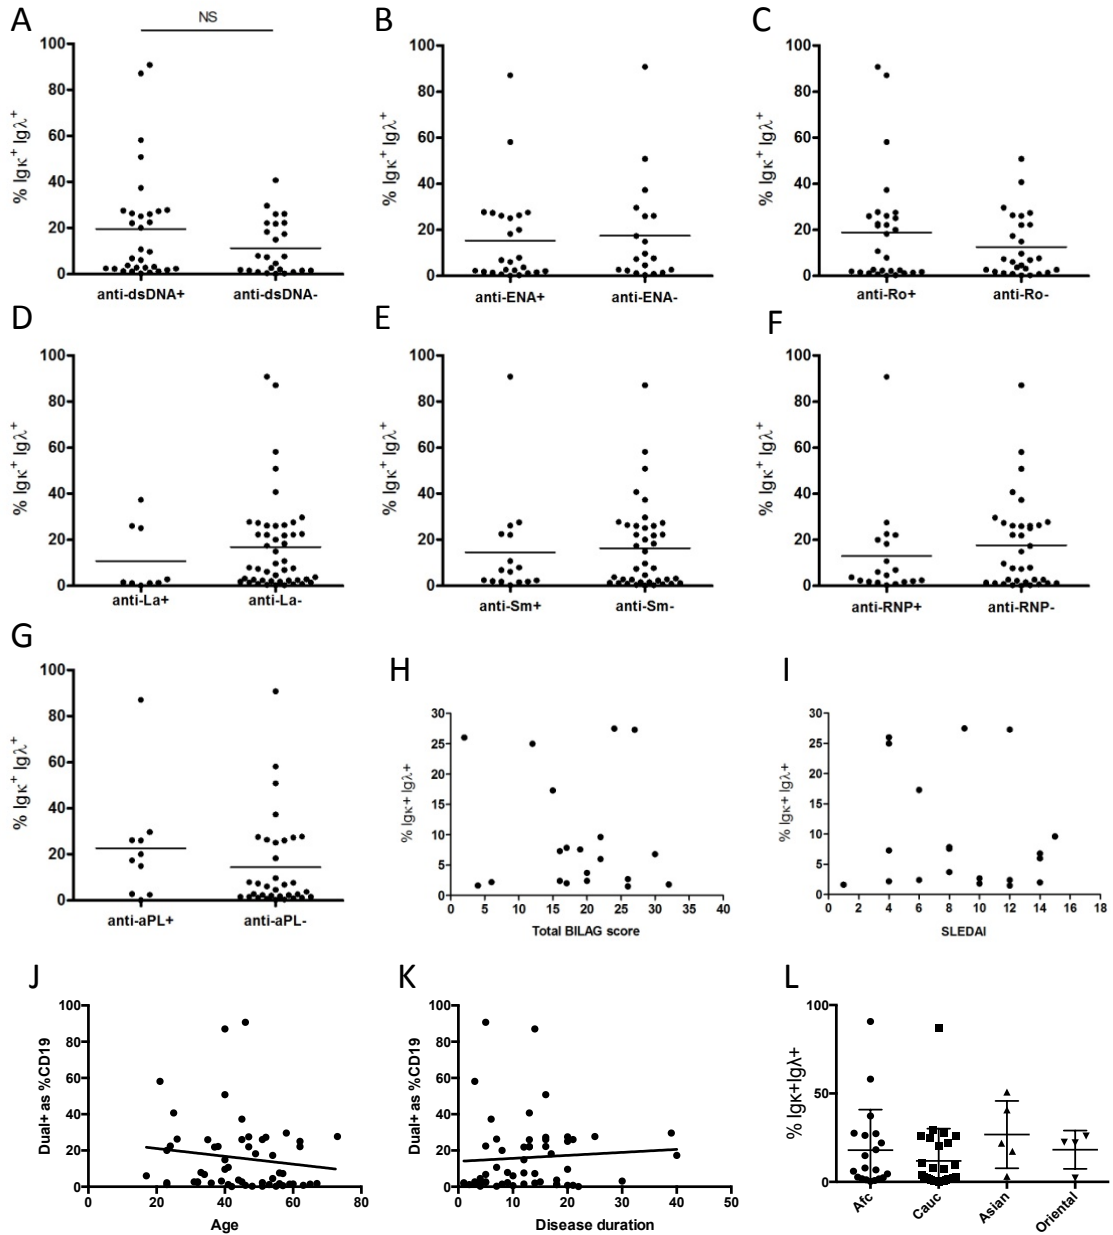

Figure S1. Dual kappa and lambda light chain expression by SLE patients positive and negative for the production of SLE-associated autoantibodies. (A) anti-dsDNA antibodies (B) anti-ENA antibodies (C) anti-Ro antibodies (D) anti-La antibodies (E) anti-Sm antigen antibodies (F) anti-RNP antibodies (G) anti-aPL antibodies. No association between dual light chain expression and (H) BILAG scores and (I) SLEDAI evaluation (J) age (K) Disease duration and (L) Disease activity.

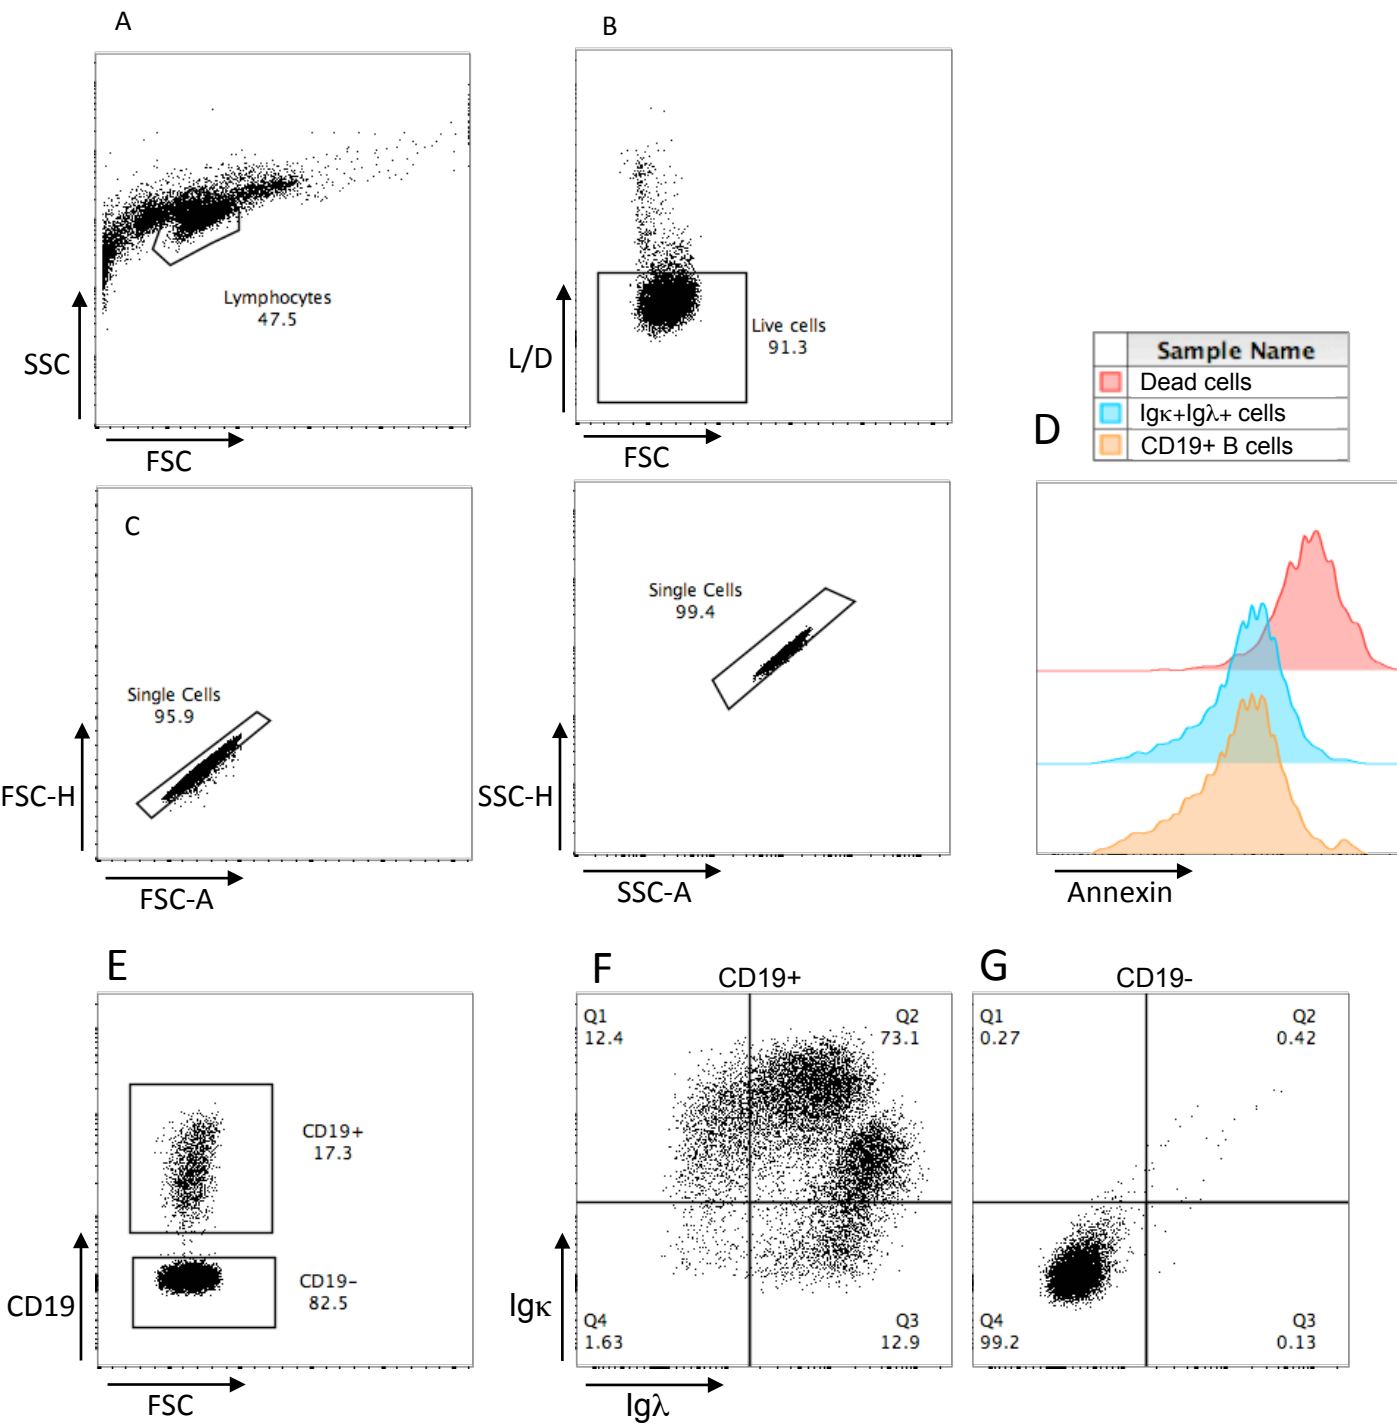

Figure S2. Examples of gating to identify A: lymphocytes B: Live cells by exclusion of live/ dead marker (L/D) C: to exclude doublets D: To confirm that cells expressin both Igκ and Igλ were annexin negative E: CD19+ B cells E: expression of Igκ and Igλ by B cells and F: cells other than B cells did not have associated surface light chains.
